# Supplementary material for: Vegetation-mediated surface soil organic carbon formation and potential carbon loss risks in Dongting Lake floodplain, China
Source: Copernicus journal article supplement (doi:10.5194/bg-23-39-2026), 2026-01-05
Supplement: Supplementary file 1 [file bg-23-39-2026-supplement.pdf]

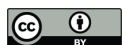

## *Supplement of*

# **Vegetation-mediated surface soil organic carbon formation and potential carbon loss risks in Dongting Lake floodplain, China**

**Liyan Wang et al.**

*Correspondence to:* Zhengmiao Deng (dengzhengmiao@163.com) and Yonghong Xie (yonghongxie@163.com)

The copyright of individual parts of the supplement might differ from the article licence.

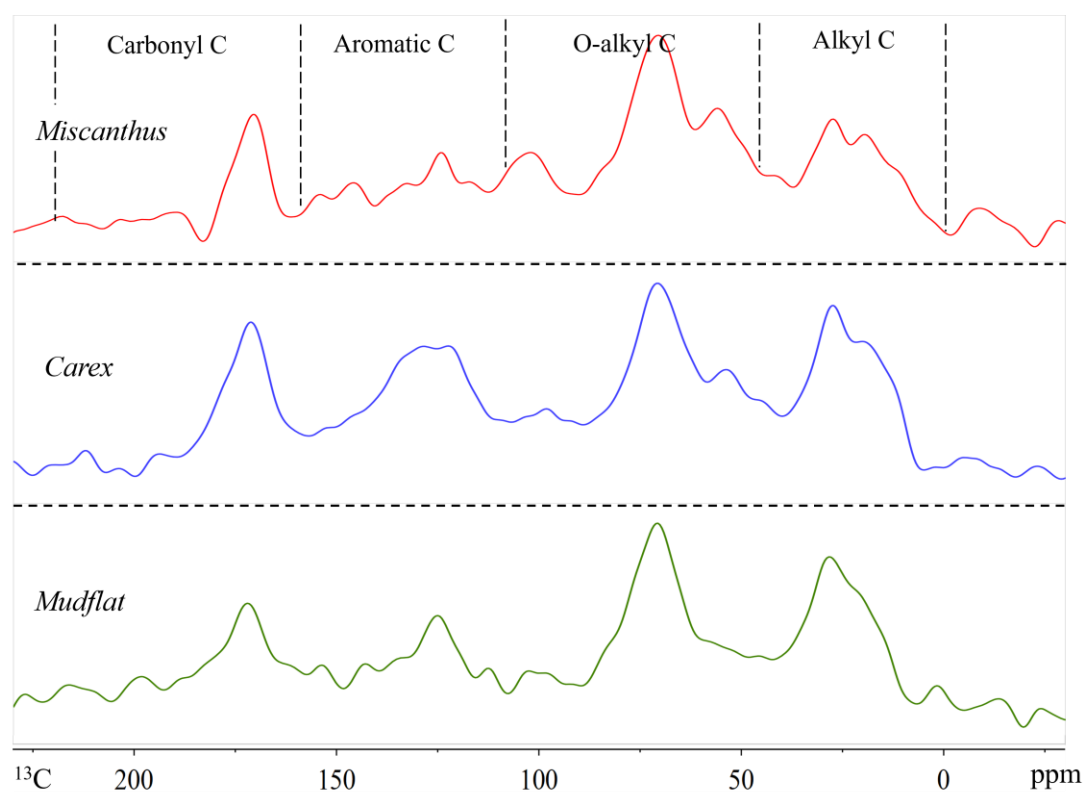

**Fig. S1** spectra of soil organic carbon acquired using  $^{13}\text{C}$  nuclear magnetic resonance of different community.
